# Supplementary material for: Hydrodeoxygenation of anisole to benzene over an Fe2P catalyst by a direct deoxygenation pathway
Source: Royal Society of Chemistry journal article supplement (doi:10.1039/d0cy00046a), 2020-01-01
Supplement: d0cy00046a1.pdf [file d0cy00046a1.pdf]

*Electronic Supplementary Information*

## **Hydrodeoxygenation of anisole to benzene over Fe<sub>2</sub>P catalyst by a direct deoxygenation pathway**

Shuyuan Wang,<sup>a,b</sup> Dan Xu,<sup>\*,a</sup> Yunlei Chen,<sup>b</sup> Song Zhou,<sup>b</sup> Di Zhu,<sup>a</sup> Xiaodong Wen,<sup>\*,b,c</sup> Yong Yang<sup>b,c</sup>  
and Yongwang Li<sup>b,c</sup>

<sup>a</sup> Energy Research Institute, Qilu University of Technology (Shandong Academy of Sciences), Jinan, 250014, People's Republic of China

<sup>b</sup> State Key Laboratory of Coal Conversion, Institute of Coal Chemistry, Chinese Academy of Sciences, Taiyuan 030001, People's Republic of China

<sup>c</sup> National Energy Research Center for Clean Fuels, Synfuels China Co., Ltd, Beijing 101400, People's Republic of China

\*Corresponding Author: xudan@sderi.cn; wxd@sxicc.ac.cn

## 1. Figures

|               |     |
|---------------|-----|
| Fig. S1.....  | S3  |
| Fig. S2.....  | S4  |
| Fig. S3.....  | S5  |
| Fig. S4.....  | S6  |
| Fig. S5.....  | S7  |
| Fig. S6.....  | S8  |
| Fig. S7.....  | S9  |
| Fig. S8.....  | S10 |
| Fig. S9.....  | S11 |
| Fig. S10..... | S12 |
| Fig. S11..... | S13 |
| Fig. S12..... | S14 |
| Fig. S13..... | S15 |
| Fig. S14..... | S16 |
| Fig. S15..... | S17 |
| Fig. S16..... | S18 |
| Fig. S17..... | S19 |
| Fig. S18..... | S20 |

## 2. Tables

|               |     |
|---------------|-----|
| Table S1..... | S21 |
|---------------|-----|

|                              |     |
|------------------------------|-----|
| 3. Kinetic measurements..... | S22 |
|------------------------------|-----|

|                    |     |
|--------------------|-----|
| 4. References..... | S28 |
|--------------------|-----|

## 1. Figures

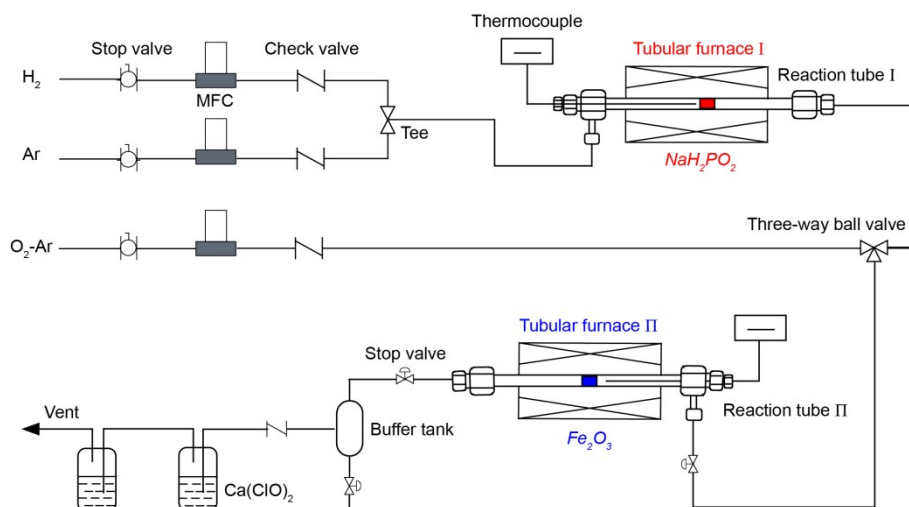

**Fig. S1** Route for the synthesis of Fe<sub>2</sub>P catalyst by a two-step phosphorization method. The first step is the reduction of Fe<sub>2</sub>O<sub>3</sub> to  $\alpha$ -Fe. The second step is heating the NaH<sub>2</sub>PO<sub>2</sub> to produce PH<sub>3</sub> to phosphatize the  $\alpha$ -Fe.

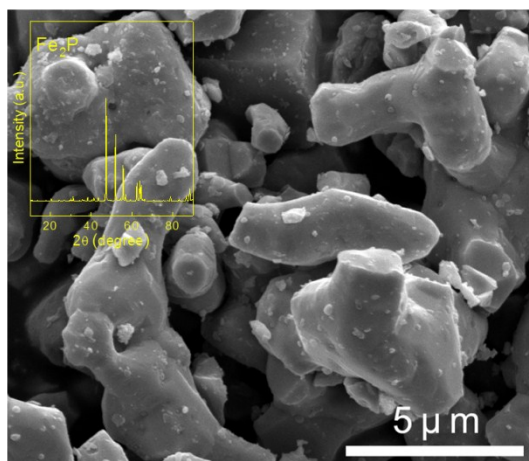

**Fig. S2** SEM images and XRD patterns of Fe<sub>2</sub>P prepared via TPR method.

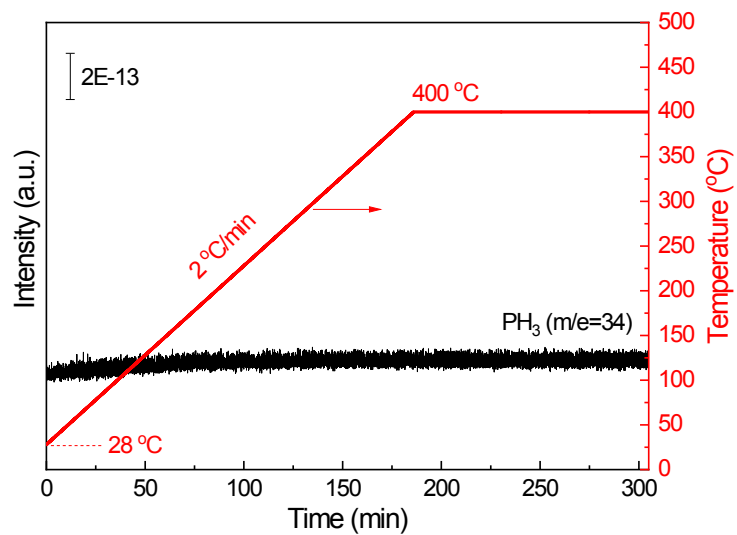

**Fig. S3** MS signal of PH<sub>3</sub> (m/e = 34) during the reduction of Fe<sub>2</sub>P catalyst.

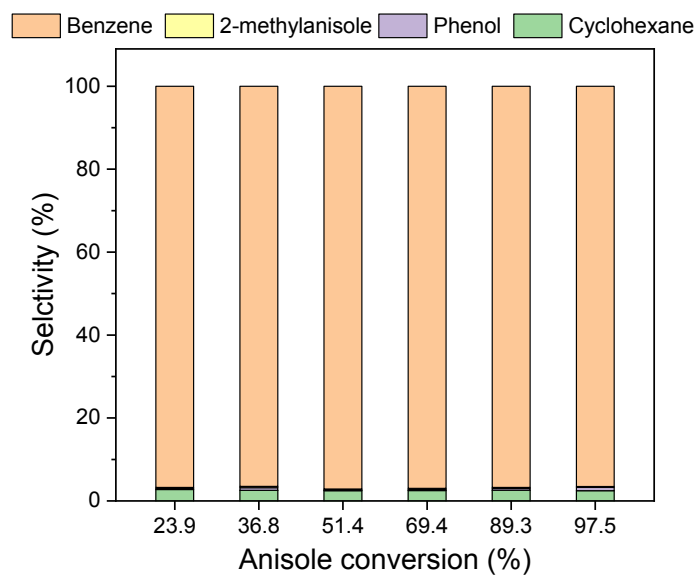

**Fig. S4** Selectivity of benzene, 2-methylanisole, phenol and cyclohexane as a function of anisole conversion measured via different space time of anisole (200 °C, 0.1 MPa, H<sub>2</sub>/anisole = 50).

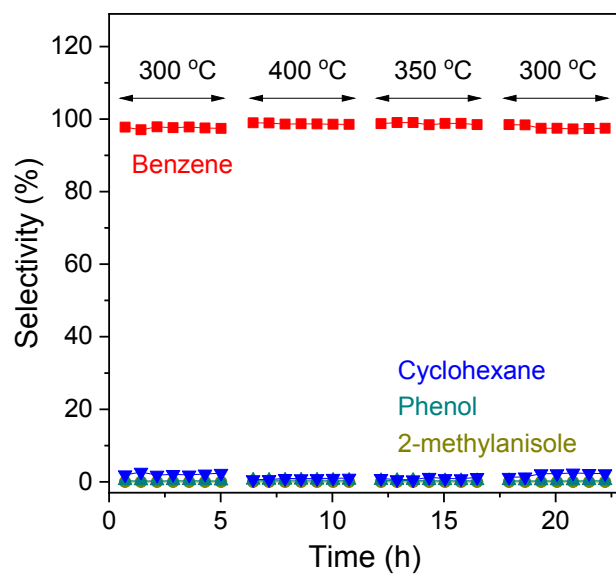

**Fig. S5** Selectivity of benzene, 2-methylanisole, phenol and cyclohexane as a function of reaction temperature (0.1 MPa,  $H_2/\text{anisole} = 50$ ,  $WHSV = 1 \text{ h}^{-1}$ ).

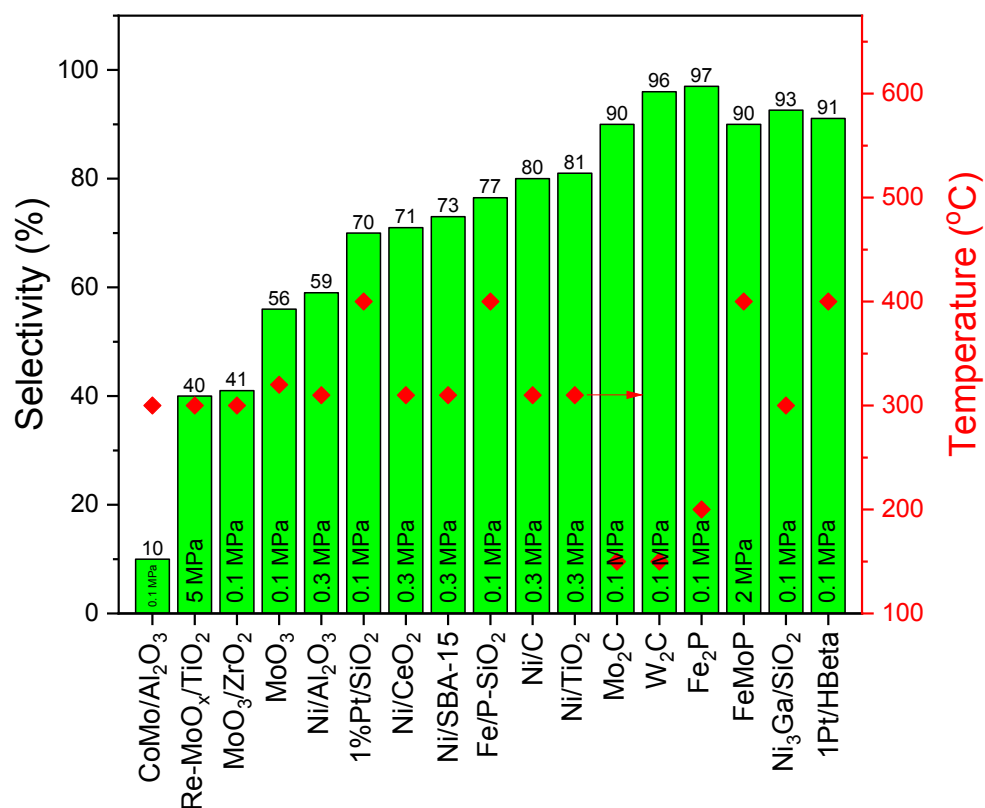

**Fig. S6** The arene selectivity of different catalysts upon different evaluation conditions (temperature and pressure). The references are followed:

*ACS Catal.*, 2015, 5, 4104-4114.

*ACS Catal.*, 2017, 8147-8151.

*Appl. Catal. A*, 2018, 549, 225-236.

*Appl. Catal. B*, 2017, 208, 60-74.

*Catal. Today*, 2011, 172, 103-110.

*Ind. Eng. Chem. Res.*, 2017, 56, 6419.

*J. Catal.*, 2011, 281, 21-29.

*J. Catal.*, 2014, 319, 44-53.

*J. Catal.*, 2017, 354, 61-77.

*ACS Catal.*, 2016, 6, 3506-3514.

*Appl. Catal. A*, 2016, 514, 224-234.

*Appl. Catal. B*, 2016, 197, 206-213.

*Appl. Catal. B*, 2019, 250, 280-291.

*Chem. Eng. J.*, 2018, 335, 120-132.

*J. Catal.*, 1985, 94, 230-238.

*J. Catal.*, 2012, 285, 315-323.

*J. Catal.*, 2016, 340, 219-226.



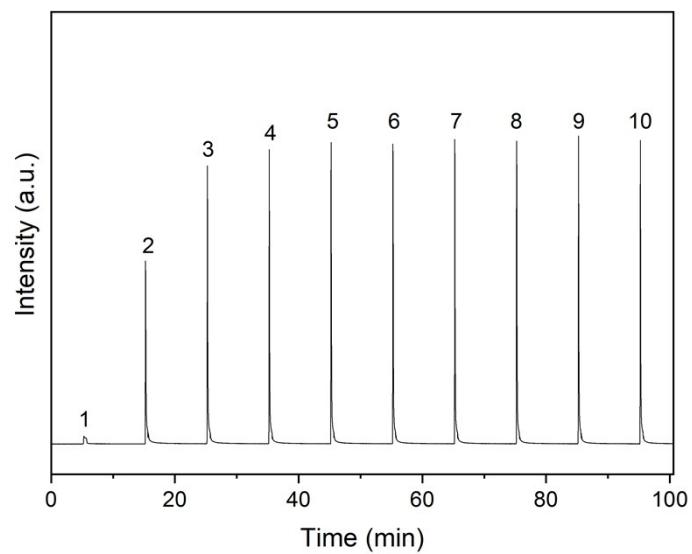

**Fig. S7** Transient response curves of CO remained during pulse of 5.01%CO/He into pure He at 30 °C over the Fe<sub>2</sub>P catalyst.

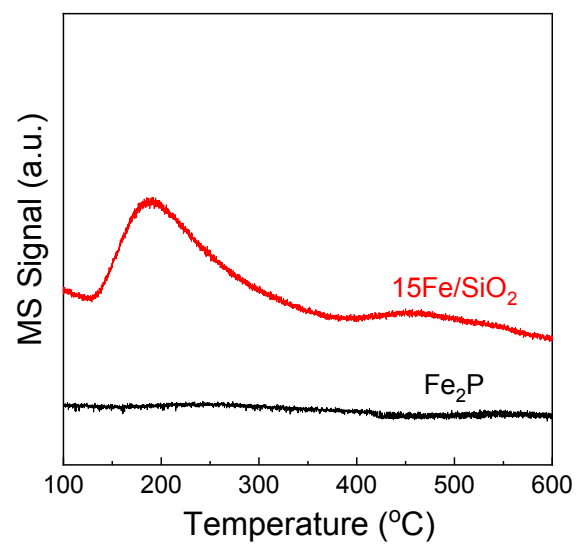

**Fig. S8** Temperature-programmed desorption of ammonia over the Fe<sub>2</sub>P and 15Fe/SiO<sub>2</sub> catalysts.

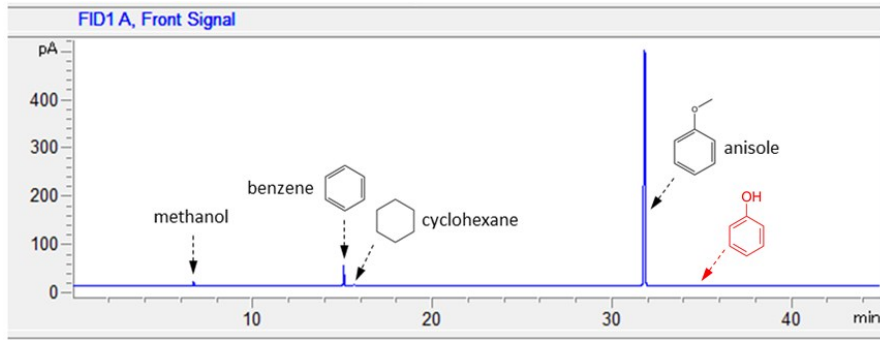

**Fig. S9** Typical GC spectroscopy signals of hydrocarbons in tail gas. (Channel A with flame ionization detector (FID1 A)).

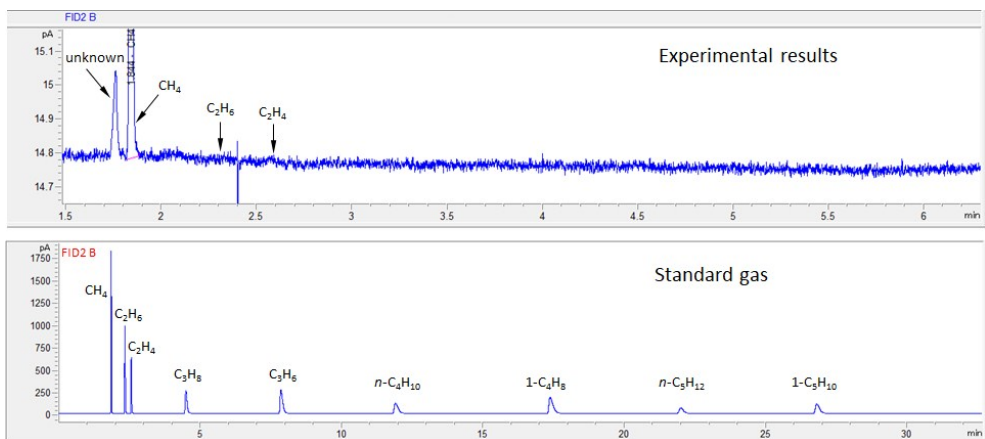

**Fig. S10** Typical GC spectroscopy for hydrocarbons in tail gas. (Channel B with flame ionization detector (FID2 B)).

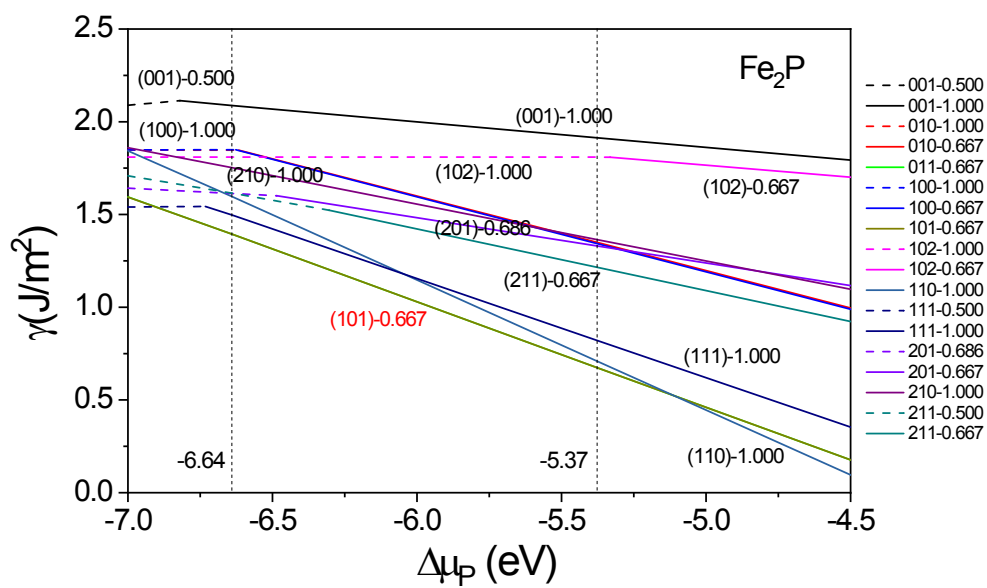

**Fig. S11** Relationship of surface free energies of the most stable facets to  $\Delta\mu$  (the boundary of  $\mu = -5.37$  and  $-6.64$  eV).

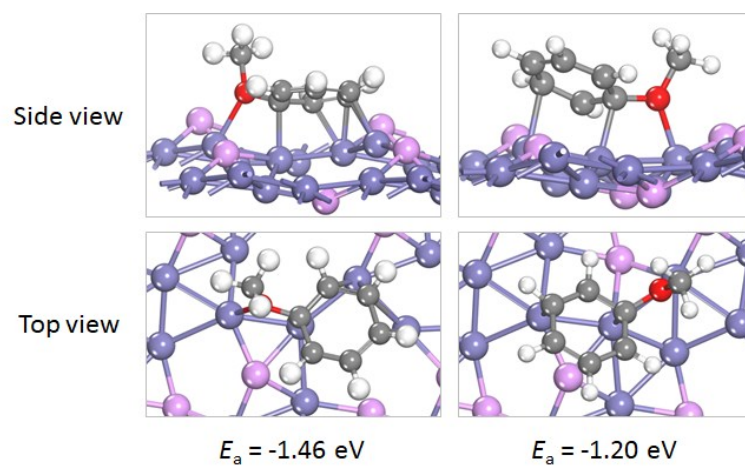

**Fig. S12** Adsorption configurations and adsorption energies of anisole on Fe<sub>2</sub>P(101) surface (Fe: blue, P: purple, C: gray, O: red, H: white).

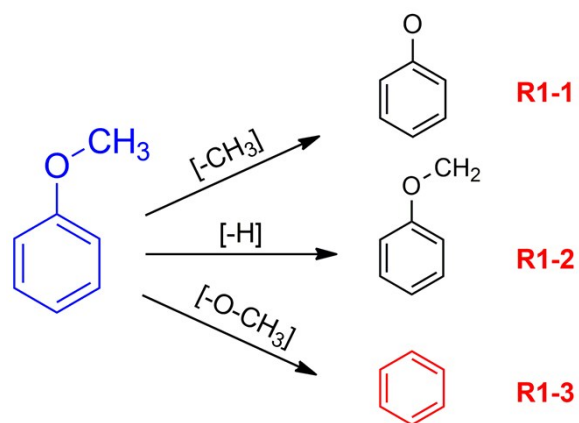

**Fig. S13** Potential reaction pathways of anisole conversion.

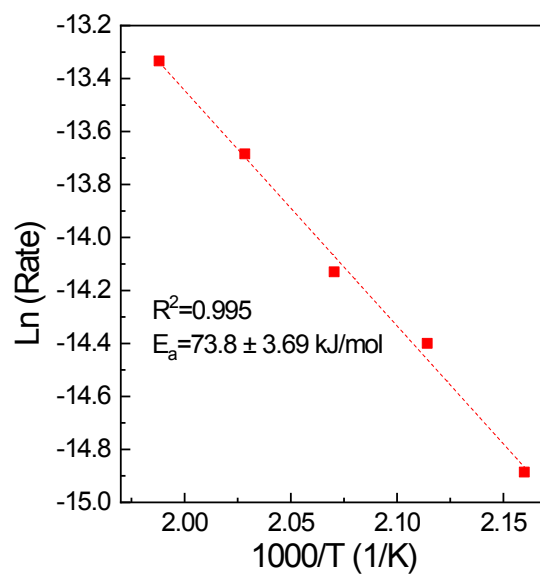

**Fig. S14** Arrhenius plots of Fe<sub>2</sub>P catalyst.



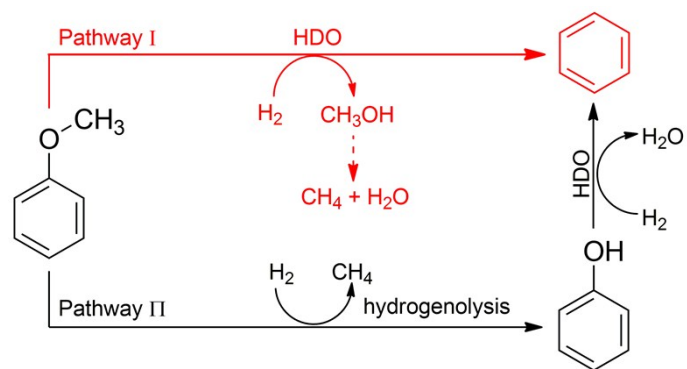

**Fig. S15** Possible reaction pathway of anisole over Fe<sub>2</sub>P catalyst.

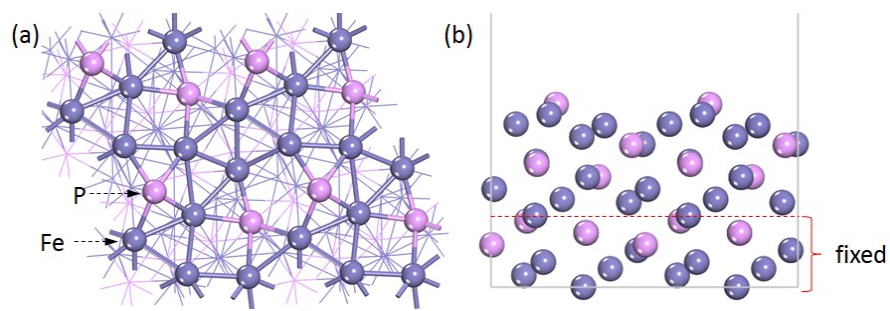

**Fig. S16** Top (a) and side (b) view of  $\text{Fe}_2\text{P}(101)$  surface.

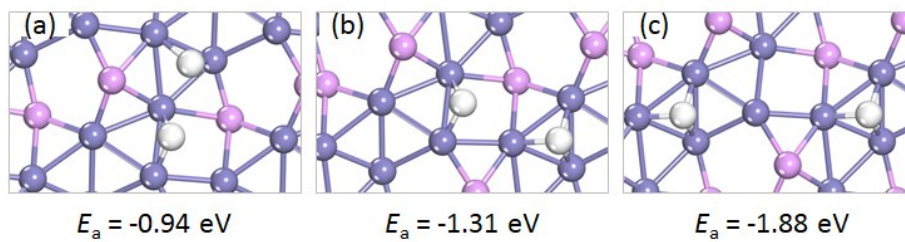

**Fig. S17** Adsorption configurations and adsorption energies of H atoms on  $\text{Fe}_2\text{P}(101)$  surface. Bri-bri (a), bri-hole (b) and hole-hole (c) configurations. (C: gray, O: red, H: white).

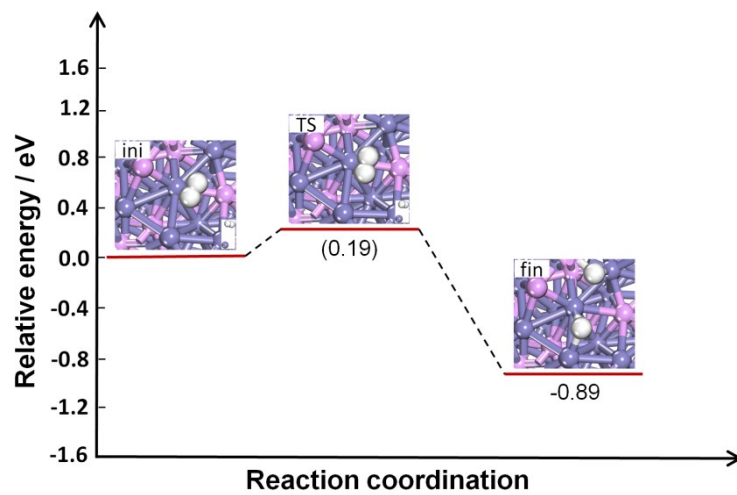

**Fig. S18** Energy profiles of H<sub>2</sub> dissociation on the Fe<sub>2</sub>P(101) surface and the correspond barrier is given in the parenthesis.

## 2. Tables

**Table S1** XPS spectra of Fe2p of Fe<sub>2</sub>P catalyst.

| catalyst          | relative concentration / % |                  |                 |                  |
|-------------------|----------------------------|------------------|-----------------|------------------|
|                   | fresh                      |                  | spent           |                  |
|                   | Fe <sup>0</sup>            | Fe <sup>δ+</sup> | Fe <sup>0</sup> | Fe <sup>δ+</sup> |
| Fe <sub>2</sub> P | 46.9                       | 53.1             | 73.0            | 27.0             |

### 3. Kinetic measurements

#### Kinetic measurements of vapor phase anisole hydrodeoxygenation on Fe<sub>2</sub>P catalysts

(1) The absence of heat transfer was checked by Mears' criterion.<sup>1,2</sup>

$$C_M = \left| \frac{-\Delta H r_{\text{obs}} \rho_b R E}{h T^2 R_g} \right|$$

Where  $\Delta H$  = heat of reaction (for  $C_7H_8O + H_2 \rightarrow C_6H_6 + CH_3OH$ )

$r_{\text{obs}}$  = observed reaction rate, kmol/kg<sub>cat</sub>·s

$\rho_b$  = density of catalyst bed, kg/m<sup>3</sup>

$R$  = catalyst particle radius, m

$E$  = activation energy, kJ/mol

$h$  = heat transfer coefficient between gas and pellet, J/m<sup>2</sup>·s·K

$R_g$  = gas constant, kJ/mol·K

$T$  = reaction temperature, K

In the current work, a gas flow rate of 55.3 ml min<sup>-1</sup> and a catalyst particle size of 0.177-0.250 mm were employed for the kinetic study. And the concentration of anisole employed in the feed was 1.96 % (the molar ratio of H<sub>2</sub> and anisole is 50:1).

First, the Reynolds number (Re) is calculated according to the followed formula:

$$Re = \frac{U \rho d_p}{\mu}$$

Where  $U$  = free-stream velocity, m/s

$\rho$  = fluid density, kg/m<sup>3</sup>

$d_p$  = diameter of pellet, m

$\mu$  = viscosity, kg/m·s

The viscosity is calculated according to the following formula:

$$\mu = (2.6693 \times 10^{-5}) \frac{\sqrt{MT}}{\sigma^2 \Omega_\mu}$$

Where  $M$  = molecular weight, g/mol

$T$  = temperature, K

$\sigma$  = collision diameter, Å

$\Omega_\mu$  = collision integrals for use with the Lennard-Jones potential

Since  $Re \ll 1$ , heat transfer coefficient was estimated by assuming  $Nu$  (Nusselt number =  $h \times d_p/k_t$ ) = 2, then:

$$Nu = \frac{hd_p}{k_t} \approx 2$$

Where  $h$  = heat transfer coefficient,  $J/m^2 \cdot s \cdot K$  or  $Watts/m^2 \cdot K$

$d_p$  = diameter of pellet, m

$k_t$  = thermal conductivity,  $J/K \cdot m \cdot s$

For  $H_2$ , the  $k_t$  is calculated using the following formula:

$$k_t = \left( \tilde{C}_p + \frac{4}{5}R_g \right) \times \frac{\mu}{M}$$

Where  $R_g$  = universal gas constant,  $cal/mol \cdot K$

$\mu$  = viscosity,  $kg/m \cdot s$

$\tilde{C}_p$  = heat capacity  $J/mol \cdot K$

For the  $Fe_2P$  catalyst,

$$T = 473.15 \text{ K}$$

$$Re = 5.689 \times 10^{-3}$$

$$\mu = 1.205 \times 10^{-5} \text{ kg/m} \cdot s$$

$$\tilde{C}_p = 7.159 \text{ cal/mol} \cdot K$$

$$k_t = 0.243 \text{ J/K} \cdot m \cdot s$$

$$\Delta H = -74.6 \text{ kJ/mol (for } C_7H_8O + H_2 \rightarrow C_6H_6 + CH_3OH)$$

$$r_{obs} = 5.571 \times 10^{-7} \text{ kmol/kg}_{cat} \cdot s$$

$$\rho_b = 1050 \text{ kg/m}^3$$

$$R = 1.0675 \times 10^{-4} \text{ m}$$

$$E = 7.38 \times 10^4 \text{ kJ/kmol}$$

$$h = 2.424 \times 10^3 \text{ J/m}^2 \cdot s \cdot K$$

$$R_g = 8.3145 \times 10^{-3} \text{ kJ/mol} \cdot K$$

$$\left| \frac{-\Delta H r_{obs} \rho_b R E}{h T^2 R_g} \right|$$

$$= \frac{(74.6 \frac{\text{kJ}}{\text{mol}}) \times (5.571 \times 10^{-7} \frac{\text{kmol}}{\text{kg}_{\text{cat}} \cdot \text{s}}) \times (1050 \frac{\text{kg}}{\text{m}^3}) \times (1.0675 \times 10^{-4} \text{ m}) \times (7.38 \times 10^4 \frac{\text{kJ}}{\text{kmol}})}{(2.424 \times 10^3 \frac{\text{J}}{\text{m}^2 \cdot \text{s} \cdot \text{K}}) \times (473.15 \text{ K})^2 \times (8.3145 \times 10^{-3} \frac{\text{kJ}}{\text{mol} \cdot \text{K}})}$$

$$= 7.62 \times 10^{-8} < 0.15$$

Therefore, heat transfer effect during the kinetic experiment could be neglected

(2) The absence of mass transport resistances was checked by Weisz-Prater Criterion ( $C_{WP}$ ) for Internal Diffusion.<sup>3</sup>

$$C_{WP} = \frac{r_{\text{obs}} \rho_c R_p^2}{D_e C_s} < 1$$

Where  $r_{\text{obs}}$  = observed reaction rate, mol/kg<sub>cat</sub>·s

$\rho_c$  = density of catalyst pellet, kg/m<sup>3</sup>

$R_p$  = catalyst particle radius, m

$D_e$  = effective diffusivity, m<sup>2</sup>/s

$C_s$  = gas concentration of A at the external surface of the catalyst, mol/m<sup>3</sup>.

$C_s$  is gas concentration of A at the external surface of the catalyst in mol/m<sup>3</sup>.  $C_s$  is calculated according to the following formula: <sup>c</sup>

$$C_s = C_o = \frac{N_{\text{anisole}}}{V} = \frac{P_{\text{anisole}}}{R_g T}$$

Where  $P_{\text{hep}}$  is the pressure of anisole, atm

$T$  = reaction temperature, K

$R_g$  = universal gas constant, atm·cm<sup>3</sup>/mol·K

The average velocity for the anisole molecular is:

$$\bar{v} = \sqrt{\frac{8k_b T}{\pi m}}$$

Where  $k_b$  = the Boltzmann'n contant,  $1.38 \times 10^{-5}$  J/K

$m$  = mass of anisole molecular



The mean free path in the gas phase is:

$$\lambda = \frac{1}{\sqrt{2}\pi\sigma^2 \frac{N_{\text{anisole}}}{V}} = \frac{R_g T}{\sqrt{2}\pi\sigma^2 P_{\text{anisole}}}$$

Where  $\sigma$  = molecular diameter,  $4.3 \times 10^{-8}$  cm

The pore diameter is 0.65 nm (from BJH desorption branch), which is much less than the mean free path ( $\lambda$ ). Consequently, pore diffusion will be dominated by Knudsen diffusion and

$$D_e \approx D_{\text{Kn}} \left( D_{\text{Kn}} = \frac{\bar{v}\lambda}{3} \right)$$

For the Fe<sub>2</sub>P catalyst,

$$r_{\text{obs}} = 5.571 \times 10^{-4} \text{ mol/kg}_{\text{cat}} \cdot \text{s}$$

$$\rho_c = 1500 \text{ kg/m}^3$$

$$R_p = 1.0675 \times 10^{-4} \text{ m}$$

$$D_e = 1.10 \times 10^{-6} \text{ m}^2/\text{s}$$

$$C_s = 0.5053 \text{ mol/m}^3.$$

$$C_{\text{WP}} = \frac{r_{\text{obs}} \rho_c R_p^2}{D_e C_s}$$

$$= \frac{(5.571 \times 10^{-4} \frac{\text{mol}}{\text{kg}_{\text{cat}} \cdot \text{s}}) \times (1500 \frac{\text{kg}}{\text{m}^3}) \times (1.0675 \times 10^{-4} \text{ m})^2}{(1.10 \times 10^{-6} \frac{\text{J}}{\text{m}^2 \cdot \text{s} \cdot \text{K}}) \times (0.5053 \frac{\text{mol}}{\text{m}^3})}$$

$$= 1.6 \times 10^{-2} < 1$$

Therefore, internal diffusion effect could be neglected during the kinetic experiments.

(3) The absence of mass transport resistances was checked by Mears' Criterion (MR) for External Diffusion.<sup>[1, 4]</sup>

$$\text{MR} = \frac{r_{\text{obs}} \rho_c R_p n}{k_c C_{\text{Ab}}} < 0.15$$

Where  $r_{\text{obs}}$  = observed reaction rate, mol/kg<sub>cat</sub>·s

$\rho_c$  = density of catalyst pellet, kg/m<sup>3</sup>

$R_p$  = catalyst particle radius, m

$n$  = reaction order

$k_c$  = external mass transfer coefficient, m/s

$C_{Ab}$  = bulk gas concentration of A, mol/m<sup>3</sup>

For the H<sub>2</sub>-anisole system, the diffusion coefficient of anisole is calculated based on the

following formula: [2]

$$D_{AB} = 0.001853 \times \sqrt{T^3 \left( \frac{1}{M_A} + \frac{1}{M_B} \right)} \times \frac{1}{P \sigma_{AB}^2 \Omega_{D_{AB}}}$$

$$\Omega_{AB} = \frac{1.06036}{T^{*0.15610}} + \frac{0.193}{e^{0.47635 \cdot T^*}} + \frac{1.03578}{e^{1.52996 \cdot T^*}} + \frac{1.76474}{e^{3.89411 \cdot T^*}}$$

Where  $D_{AB}$  = binary diffusion coefficient of A in B, m<sup>2</sup>/s

$\phi_p$  = pellet porosity

$\sigma_c$  = constriction factor

$\tilde{\tau}$  = tortuosity

$M_A$  = molecular weight of H<sub>2</sub>, g/mol

$M_B$  = molecular weight of anisole, g/mol

$P$  = reaction pressure, atm

$\sigma_{AB}$  = Lennard-Jones parameter, Å

$\Omega_{AB}$  = collision Integral

$$T^* = \frac{kT}{\varepsilon}$$

Because  $Re \ll 1$ , the Nusselt number ( $Sh = 2 + 0.6Re^{1/2}Sc^{1/3}$ ) can be estimated to be 2 ( $Sc$  is

Schmidt number,  $Sc = \frac{\nu}{D_{AB}}$ ). Then,

$$Sh = \frac{k_c \times d_p}{D_{AB}} \approx 2$$

Where  $k_c$  = external mass transfer coefficient, m/s

$d_p$  = diameter of pellet, m

For the  $\text{Fe}_2\text{P}$  catalyst,

$$r_{\text{obs}} = 5.571 \times 10^{-4} \text{ mol/kg}_{\text{cat}} \cdot \text{s}$$

$$\rho_b = 1050 \text{ kg/m}^3$$

$$R_p = 1.0675 \times 10^{-4} \text{ m}$$

$$n = 0.5$$

$$k_c = 0.56 \text{ m/s}$$

$$C_{\text{AB}} = 0.4171 \text{ mol/m}^3$$

$$\frac{r_{\text{obs}} \rho_b R_p n}{k_c C_{\text{AB}}}$$

$$= \frac{(5.571 \times 10^{-4} \frac{\text{mol}}{\text{kg}_{\text{cat}} \cdot \text{s}}) \times (1050 \frac{\text{kg}}{\text{m}^3}) \times (1.0675 \times 10^{-4} \text{ m}) \times 0.5}{(0.56 \frac{\text{m}}{\text{s}}) \times (0.4171 \frac{\text{mol}}{\text{m}^3})}$$

$$= 1.34 \times 10^{-4} < 0.15$$

Therefore, external diffusion effect could be neglected during the kinetic experiments.

#### 4. References

- 1 H.S. Fogler, Elements of Chemical Reaction Engineering, 5th ed, Prentice Hall, Upper Saddle River, NJ, **2016.**,
- 2 R.B. Bird, W.E. Stewart, E.N. Lightfoot, Transport Phenomena, 2nd Edition, John Wiley & Sons, Inc, 605 Third Avenue, New York, **2002.**,
- 3 M. Albert Vannice, Kinetics of Catalytic Reactions, Springer Science + Business Media, Inc., 233 Spring Street, New York, NY 10013, USA, **2005.**,
- 4 W.-S. Lee, Z. Wang, R.J. Wu, A. Bhan, *J. Catal.*, 2014, **319**, 44-53.
